# Supplementary material for: Comparative efficacy and complication rates after local treatment for cervical intraepithelial neoplasia and stage 1a1 cervical cancer: protocol for a systematic review and network meta-analysis from the CIRCLE Group
Source: PubMed Central journal article supplement (PMC6687014; doi:10.1136/bmjopen-2018-028008), 2019-08-02
Supplement: bmjopen-2018-028008supp002.pdf [file bmjopen-2018-028008supp002.pdf]

**Supplementary File 2: Search algorithms****Medline Ovid RCT only**

- 1 exp Cervical Intraepithelial Neoplasia/
- 2 CIN.mp.
- 3 (cervi\* and (intraepithel\* or epithel\*)).mp.
- 4 (cervi\* and dysplasia).mp.
- 5 (cervi\* and carcinoma in situ).mp.
- 6 (cervi\* and cancer in situ).mp.
- 7 (cervi\* and (precancer\* or pre-cancer\*)).mp.
- 8 1 or 2 or 3 or 4 or 5 or 6 or 7
- 9 surgery.fs.
- 10 exp Gynecologic Surgical Procedures/
- 11 (surg\* or ablat\* or excis\* or cryotherapy or laser\* or cone or conisation or biopsy or transformation zone or LLETZ or LEEP).mp.
- 12 9 or 10 or 11
- 13 8 and 12
- 14 randomized controlled trial.pt.
- 15 controlled clinical trial.pt.
- 16 randomized.ab.
- 17 placebo.ab.
- 18 clinical trials as topic.sh.
- 19 randomly.ab.
- 20 trial.ti.
- 21 14 or 15 or 16 or 17 or 18 or 19 or 20
- 22 13 and 21

**Medline Ovid NON RCT only**

1. exp Cervical Intraepithelial Neoplasia/
2. CIN.mp. [mp=title, abstract, original title, name of substance word, subject heading word, keyword heading word, protocol supplementary concept word, rare disease supplementary concept word, unique identifier, synonyms]
3. (cervi\* and (intraepithel\* or epithel\*)).mp. [mp=title, abstract, original title, name of substance word, subject heading word, keyword heading word, protocol supplementary concept word, rare disease supplementary concept word, unique identifier, synonyms]
4. (cervi\* and dysplasia).mp. [mp=title, abstract, original title, name of substance word, subject heading word, keyword heading word, protocol supplementary concept word, rare disease supplementary concept word, unique identifier, synonyms]

5. (cervi\* and carcinoma in situ).mp. [mp=title, abstract, original title, name of substance word, subject heading word, keyword heading word, protocol supplementary concept word, rare disease supplementary concept word, unique identifier, synonyms]
6. (cervi\* and cancer in situ).mp. [mp=title, abstract, original title, name of substance word, subject heading word, keyword heading word, protocol supplementary concept word, rare disease supplementary concept word, unique identifier, synonyms]
7. (cervi\* and (precancer\* or pre-cancer\*)).mp. [mp=title, abstract, original title, name of substance word, subject heading word, keyword heading word, protocol supplementary concept word, rare disease supplementary concept word, unique identifier, synonyms]
8. 1 or 2 or 3 or 4 or 5 or 6 or 7
9. surgery.fs.
10. exp Gynecologic Surgical Procedures/
11. (surg\* or ablat\* or excis\* or cryotherapy or laser\* or cone or conisation or biopsy or transformation zone or LLETZ or LEEP).mp. [mp=title, abstract, original title, name of substance word, subject heading word, keyword heading word, protocol supplementary concept word, rare disease supplementary concept word, unique identifier, synonyms]
12. 9 or 10 or 11
13. 8 and 12
14. randomized controlled trial.pt.
15. controlled clinical trial.pt.
16. randomized.ab.
17. placebo.ab.
18. clinical trials as topic.sh.
19. randomly.ab.
20. trial.ti.
21. groups.ab.
22. exp cohort studies/
23. exp case-control studies/
24. (cohort\* or prospective\* or retrospective\* or (case\* and (control\* or series))).mp.
25. 14 or 15 or 16 or 17 or 18 or 19 or 20 or 21 or 22 or 23 or 24
26. (animals not (humans and animals)).sh.
27. 25 not 26
28. 13 and 27

**Embase Ovid RCT only**

- 1 exp Uterine Cervix Carcinoma in Situ/

- 2 CIN.mp.
- 3 (cervi\* and (intraepithel\* or epithel\*)).mp.
- 4 (cervi\* and dysplasia).mp.
- 5 (cervi\* and carcinoma in situ).mp.
- 6 (cervi\* and cancer in situ).mp.
- 7 (cervi\* and (precancer\* or pre-cancer\*)).mp.
- 8 1 or 2 or 3 or 4 or 5 or 6 or 7
- 9 su.fs.
- 10 exp gynecologic surgery/
- 11 (surg\* or ablat\* or excis\* or cryotherapy or laser\* or cone or conisation or biopsy or transformation zone or LLETZ or LEEP).mp.
- 12 9 or 10 or 11
- 13 8 and 12
- 14 crossover procedure/
- 15 double-blind procedure/
- 16 randomized controlled trial/
- 17 single-blind procedure/
- 18 random\*.mp.
- 19 factorial\*.mp.
- 20 (crossover\* or cross over\* or cross-over\*).mp.
- 21 placebo\*.mp.
- 22 (double\* adj blind\*).mp.
- 23 (singl\* adj blind\*).mp.
- 24 assign\*.mp.
- 25 allocat\*.mp.
- 26 volunteer\*.mp.
- 27 14 or 15 or 16 or 17 or 18 or 19 or 20 or 21 or 22 or 23 or 24 or 25 or 26
- 28 13 and 27

### **Embase Ovid All Studies**

1. exp Uterine Cervix Carcinoma in Situ/
2. CIN.mp. [mp=title, abstract, heading word, drug trade name, original title, device manufacturer, drug manufacturer, device trade name, keyword, floating subheading word]
3. (cervi\* and (intraepithel\* or epithel\*)).mp. [mp=title, abstract, heading word, drug trade name, original title, device manufacturer, drug manufacturer, device trade name, keyword, floating subheading word]

4. (cervi\* and dysplasia).mp. [mp=title, abstract, heading word, drug trade name, original title, device manufacturer, drug manufacturer, device trade name, keyword, floating subheading word]
5. (cervi\* and carcinoma in situ).mp. [mp=title, abstract, heading word, drug trade name, original title, device manufacturer, drug manufacturer, device trade name, keyword, floating subheading word]
6. (cervi\* and cancer in situ).mp. [mp=title, abstract, heading word, drug trade name, original title, device manufacturer, drug manufacturer, device trade name, keyword, floating subheading word]
7. (cervi\* and (precancer\* or pre-cancer\*)).mp. [mp=title, abstract, heading word, drug trade name, original title, device manufacturer, drug manufacturer, device trade name, keyword, floating subheading word]
8. 1 or 2 or 3 or 4 or 5 or 6 or 7
9. su.fs.
10. exp gynecologic surgery/
11. (surg\* or ablat\* or excis\* or cryotherapy or laser\* or cone or conisation or biopsy or transformation zone or LLETZ or LEEP).mp.
12. 9 or 10 or 11
13. 8 and 12
14. exp controlled clinical trial/
15. randomized.ab.
16. randomly.ab.
17. trial.ab.
18. groups.ab.
19. exp cohort analysis/
20. cohort\*.mp.
21. exp retrospective study/
22. exp prospective study/
23. (case\* and series).mp.
24. 14 or 15 or 16 or 17 or 18 or 19 or 20 or 21 or 22 or 23
25. 13 and 24

**CENTRAL**

- #1 MeSH descriptor Cervical Intraepithelial Neoplasia explode all trees
- #2 CIN
- #3 cervi\* and (intraepithel\* or epithel\*)
- #4 cervi\* and dysplasia
- #5 cervi\* and carcinoma in situ
- #6 cervi\* and cancer in situ
- #7 cervi\* and (precancer\* or pre-cancer\*)
- #8 (#1 OR #2 OR #3 OR #4 OR #5 OR #6 OR #7)

#9 Any MeSH descriptor with qualifier(s): [Surgery - SU]  
#10 MeSH descriptor: [Gynecologic Surgical Procedures] explode all trees  
#11 surg\* or ablat\* or excis\* or cryotherapy or laser\* or cone or conisation or biopsy  
or transformation zone or LLETZ or LEEP  
#12 #9 or #10 or #11  
#13 #8 and #12
